# Supplementary material for: Mounting, structure and autocleavage of a type VI secretion-associated Rhs polymorphic toxin
Source: PubMed Central journal article supplement (PMC8636562; doi:10.1038/s41467-021-27388-0), 2021-12-01
Supplement: 41467_2021_27388_MOESM1_ESM.pdf [file 41467_2021_27388_MOESM1_ESM.pdf]

# SUPPLEMENTARY INFORMATION

## Mounting, structure and autocleavage of a type VI secretion-associated Rhs polymorphic toxin

Dukas Jurėnas, Leonardo Talachia Rosa, Martial Rey, Julia Chamot-Rooke,  
Rémi Fronzes, Eric Cascales

### Supplementary Figures and Captions

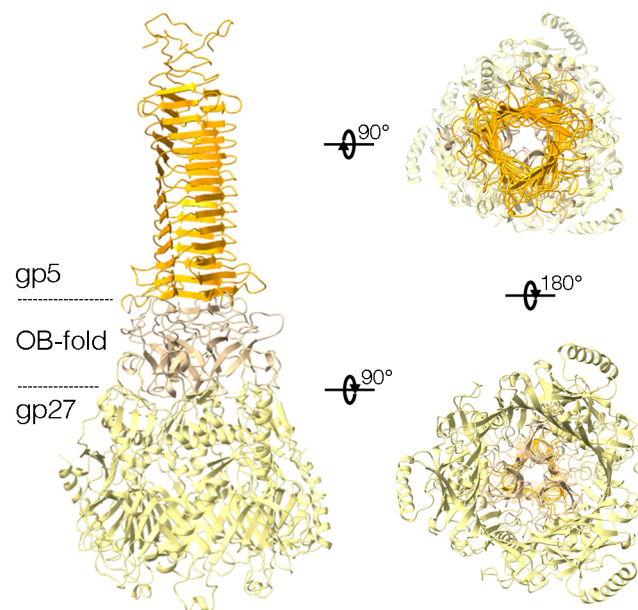

**Supplementary Figure 1 | *P. laumondii* VgrG structural model.** The model was generated using the Galaxy Homomer server and the *P. aeruginosa* VgrG1 protein (PDB: 4MTK) as template, imposing a trimeric oligomeric state. The different VgrG domains are indicated, and colored as used throughout the article's figures.

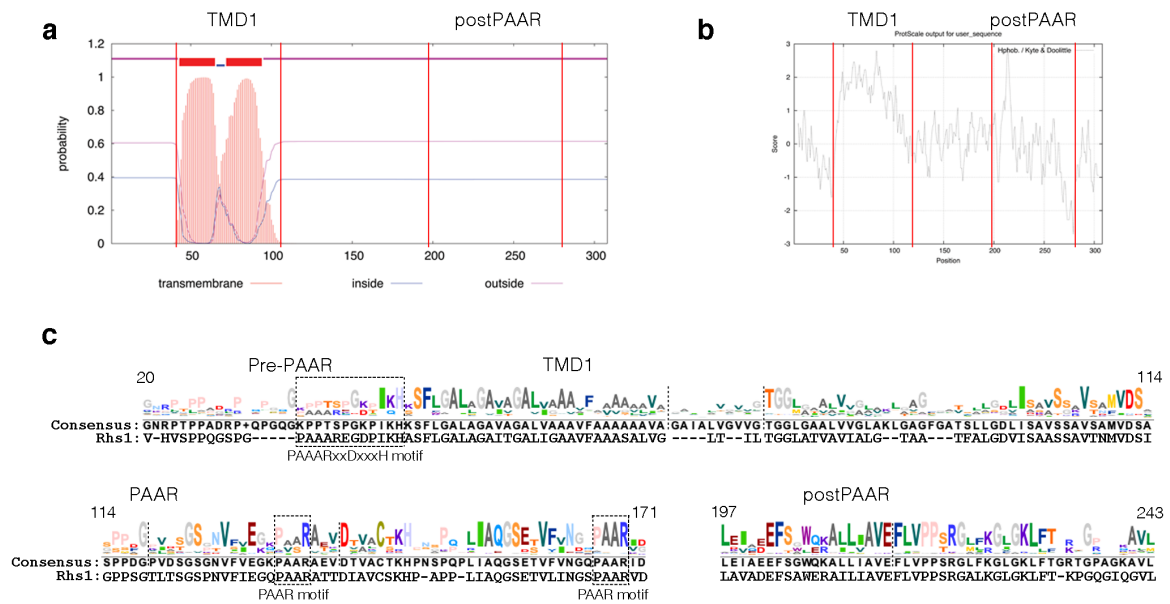

**Supplementary Figure 2 | Hydrophobicity and conservation of the Rhs1<sup>NT</sup> domain.** (a) Transmembrane segments prediction using the TMHMM server. (b) ProtScale (ExPASy) hydrophobicity analysis using Kyte & Doolittle scale. (c) Sequence logo highlighting the residue conservation in the prePAAR, TMD1, PAAR and postPAAR domains. The sequence logo was generated from an alignment of 250 homologous sequences. Conserved PAAR motifs are boxed, conservation consensus and *Photorhabdus* Rhs protein sequence are provided below.

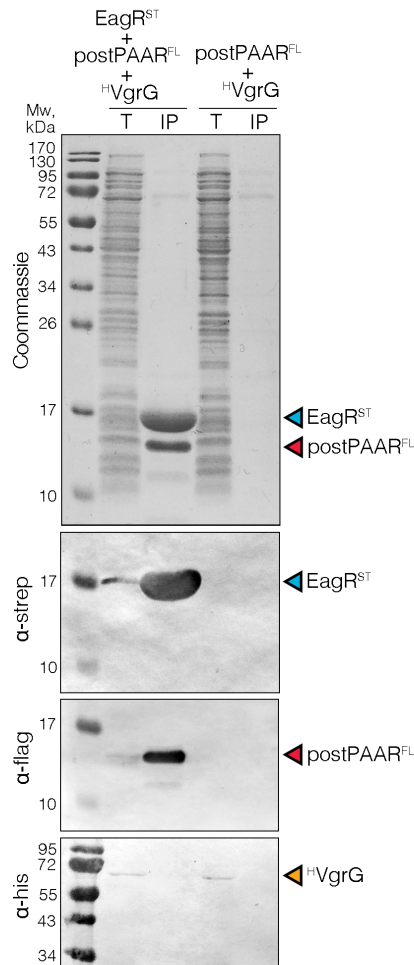

**Supplementary Figure 3 | EagR binds to the Rhs1 postPAAR region.** Pull-down assay. Total cell extracts (T) from *E. coli* BL21(DE3) cells producing His<sub>6</sub>-tagged VgrG (<sup>H</sup>VgrG) and FLAG-tagged Rhs1-postPAAR in presence or absence of Strep-tagged EagR (<sup>ST</sup>EagR), were subjected to purification on streptactin-agarose beads. Strep-tagged and co-precipitated proteins were eluted with desthiobiotin (IP). Total and IP fractions were analyzed by SDS-PAGE and co-purified proteins were stained by Coomassie blue (upper panel) or immunodetected using anti-His, anti-Strep and anti-FLAG antibodies (lower panels). Molecular weight markers (Mw, in kDa) are indicated on left. The pull-down assay has been performed in triplicate, and a representative experiment is shown.



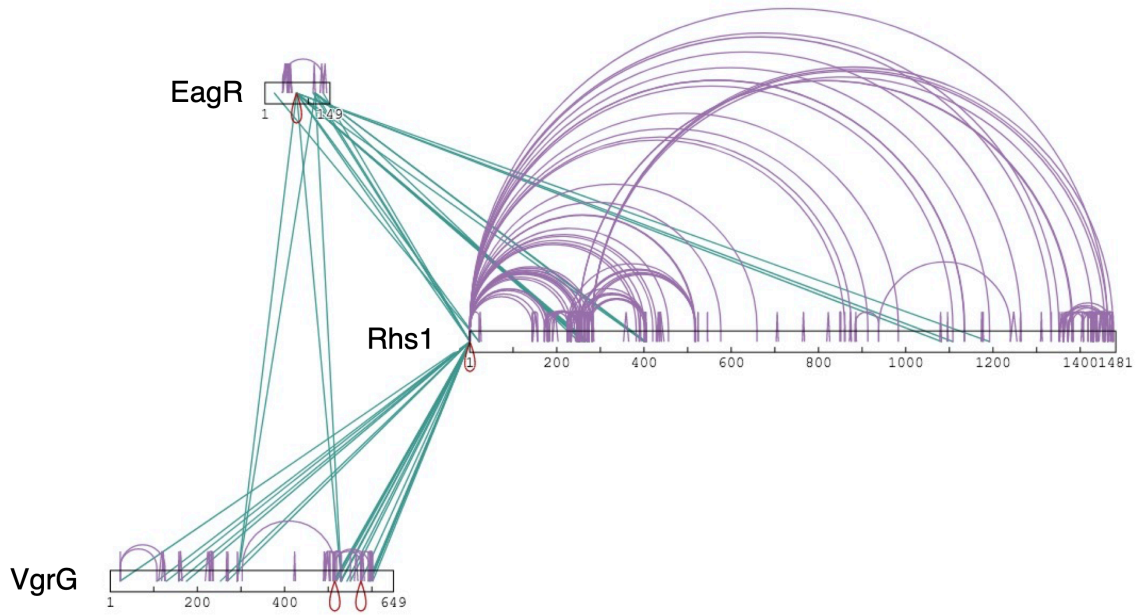

**Supplementary Figure 5 | Schematic representation of inter-protein and intra-protein contacts of Rhs1, EagR and VgrG detected by cross-linking with NNP9 coupled to mass spectrometry analyses.** The representation is made with the Crosslinkviewer software. Inter- and intra-protein contacts are shown in purple and green, respectively.

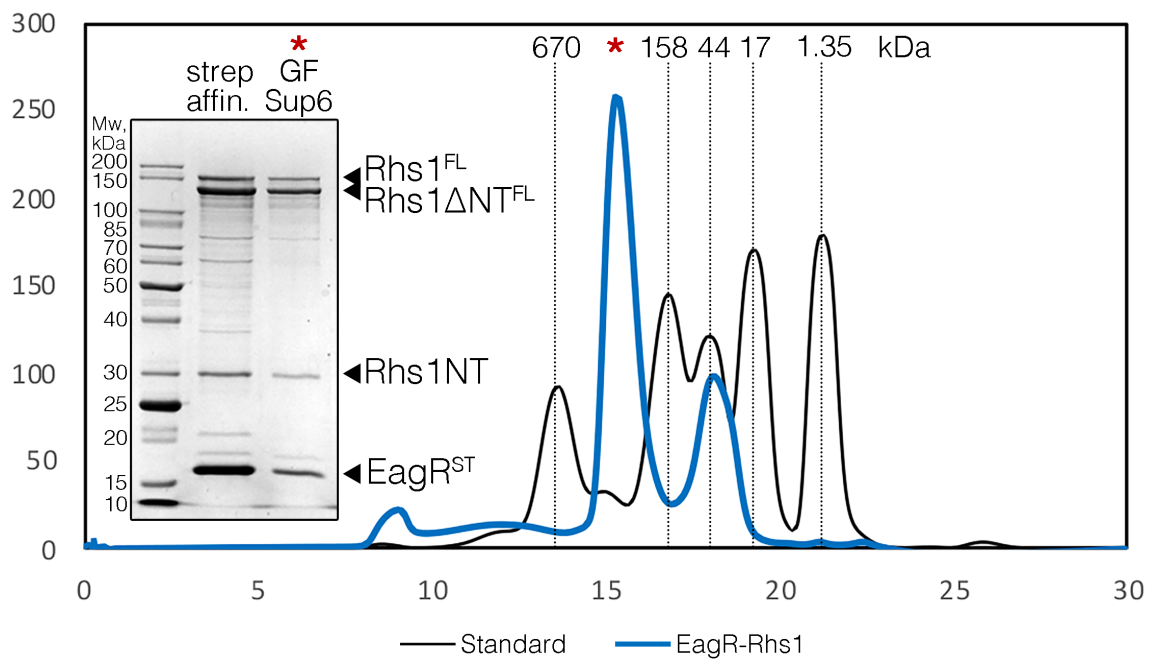

**Supplementary Figure 6 | Purification of the Rhs1-EagR complex.** Chromatogram of the purified *P. laumondii* Rhs1-EagR complex (blue line) on Superose6. The major peak (red star, \*) corresponds to the purified complex whereas the 42-kDa peak corresponds to the EagR dimer. Molecular weight standards are shown as the black line. The inset on left shows the SDS-PAGE analysis and Coomassie blue staining of the fractions obtained after StrepTactin affinity (strep affin.) and gel filtration (GF, fraction corresponding to the \* peak) chromatographies. Molecular weight markers (Mw, in kDa) are indicated on left.

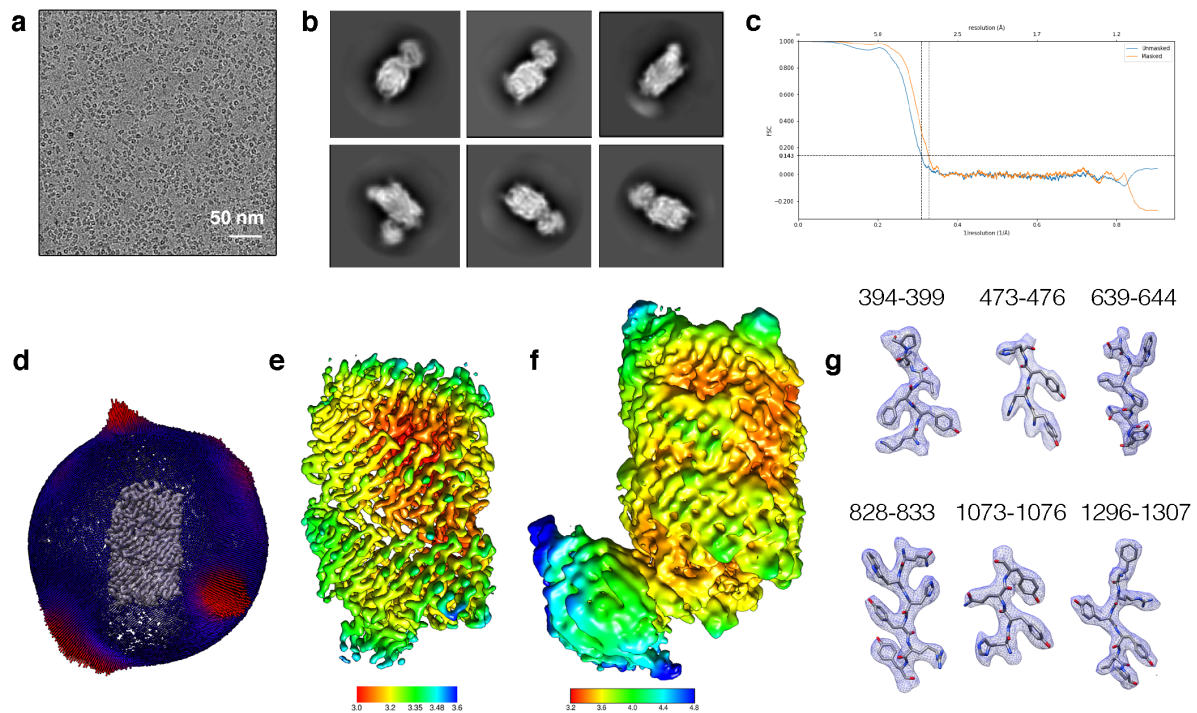

**Supplementary Figure 7 | Structural modelling of the *P. laumondii* Rhs1 barrel by cryo-EM.** (a) Cryo-electron micrograph of the Rhs1-EagR complex. The purified Rhs1-EagR complex has been deposited on eight independent grids, and a representative field is shown. (b) Representative 2D classes of the Rhs1-EagR complex after 2D classification in Relion 3.1. (c) Fourier Shell Correlation (FSC) of the final Rhs1 3D reconstruction. The unmasked map crosses the 0.143 FSC threshold at 3.23 Å, while the masked map crosses at 3.05 Å. (d) Orientation distribution of particles used for 3D reconstruction in Relion 3.1. The number of particles in each orientation is proportional to the plotted bars on the Euler sphere around a representation of the Rhs1 cryo-EM map. (e) Final 3D cryo-EM masked map of Rhs1 coloured by local distribution. (f) Global mask of the Rhs1-EagR complex coloured by local resolution. (g) Representative regions of the Rhs1 cryo-EM map in mesh layout, with respective modelled residues shown as a stick representation.

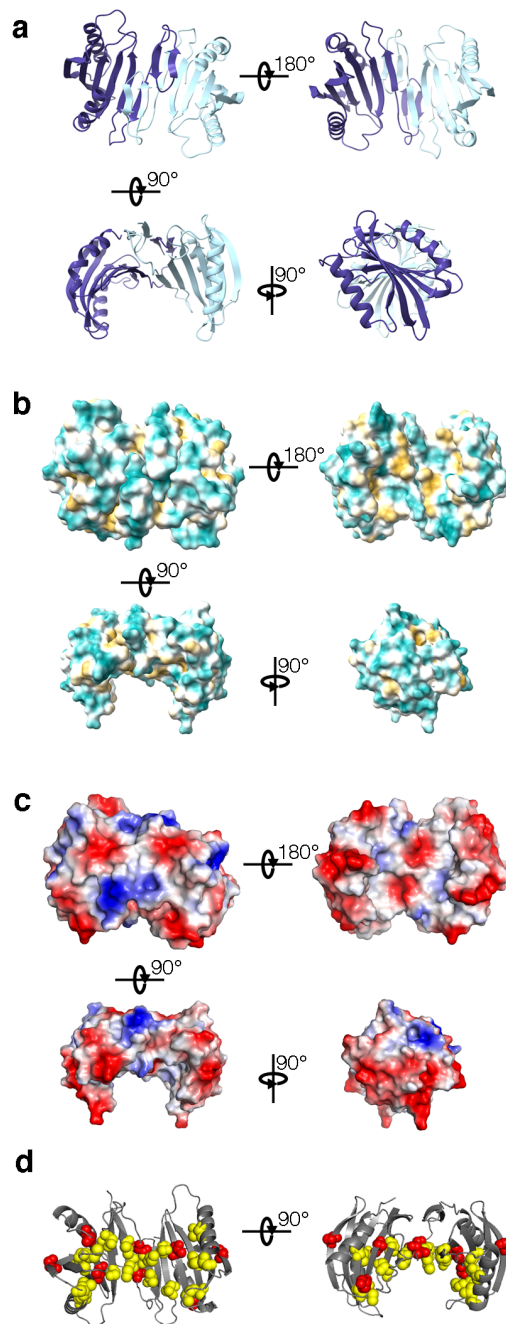

**Supplementary Figure 8 | *P. laumondii* Eag structural model.** The model was generated using the Galaxy Homomer server and the *P. aeruginosa* EagR protein (PDB: 1TU1) as template, imposing a dimeric oligomeric state. (a) Ribbon representation. The two monomers are colored in dark blue and cyan. (b) Surface hydrophobicity representation in the range of colors, from cyan (hydrophilic) to sand (hydrophobic) based on Kyte-Doolittle scale. (c) Electrostatic surface representation (blue: positive charges, red, negative charge; grey, neutral or hydrophobic). (d) Mapping of the EagR residues in contact with Rhs1 on the EagR structural model. Residues identified by our cross-link mass spectrometry approach are shown in red while residues in yellow represent conserved residues between Eag members<sup>1</sup>.



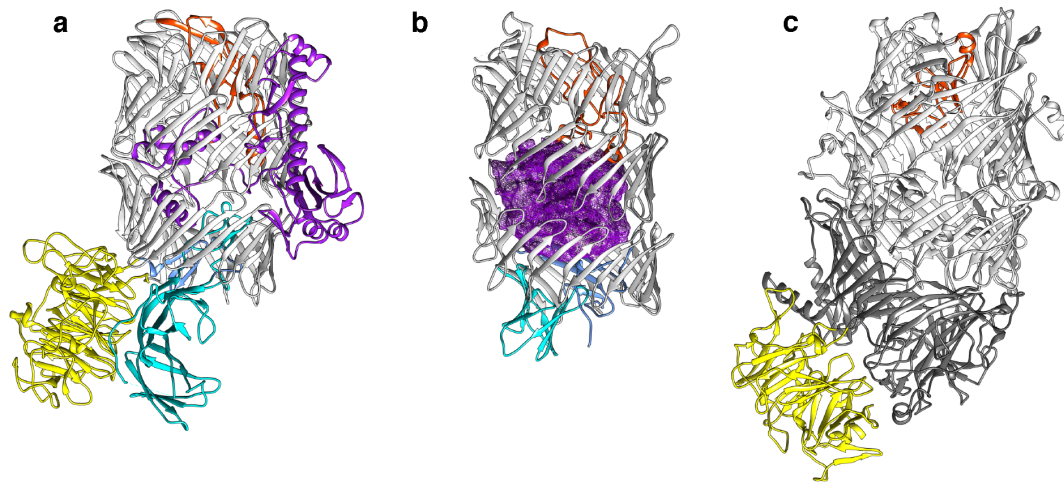

**Supplementary Figure 9** | Structural comparison of teneurin (a), Rhs1 (b) and TcB-TcC complex (c). The N-terminal plug is shown in blue (Ig-like in cyan and seal in light blue), the  $\beta$ -barrel in grey (dark and light grey for TcB and TcC), the protease domain in red; the C-terminal extension (toxin for Rhs and Tc-toxins) in purple, and, when present, the  $\beta$ -propeller in yellow.

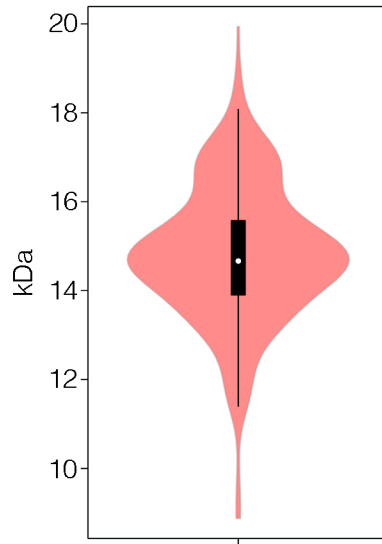

**Supplementary Figure 10** | Violin plot distribution of the molecular weight (in kDa) of the Rhs<sup>CT</sup> toxin extensions ( $n=222$ ). Sequences from Rhs proteins were extracted, and the C-terminal extension domains were identified by the position of the conserved PxxxxDPxGL demarcation. The violin distribution (red surface) indicates the number of proteins (in the horizontal axis) with the indicated molecular weight (in kDa). The minima (8.868 kDa) and maxima (19.945 kDa) are shown. The central black bar indicates the first (13.915 kDa) and third (15.577) quartile, and the white dot indicates the median (14.666 kDa). The lower and upper whiskers indicate the 5<sup>th</sup> (11.530 kDa) and 95<sup>th</sup> (17.691 kDa) percentiles respectively.

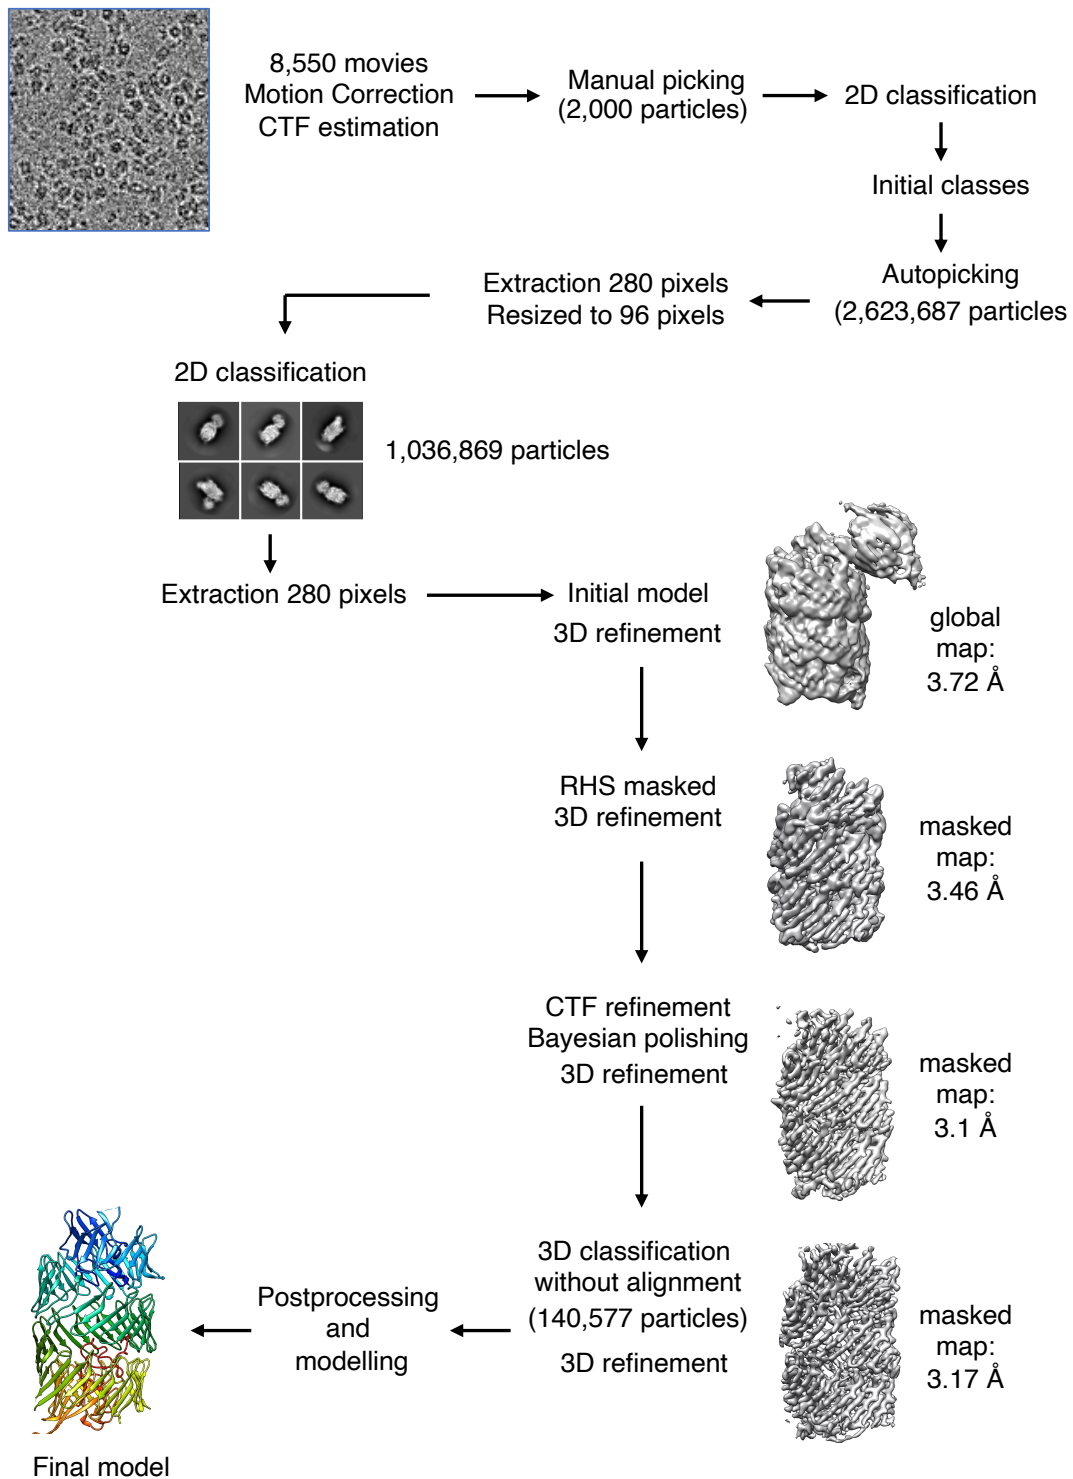

**Supplementary Figure 11** | Flowchart of the cryo-EM processing procedure for the *P. laumondii* Rhs1-EagR complex, from data collection to the final model.

**Figure 4A**

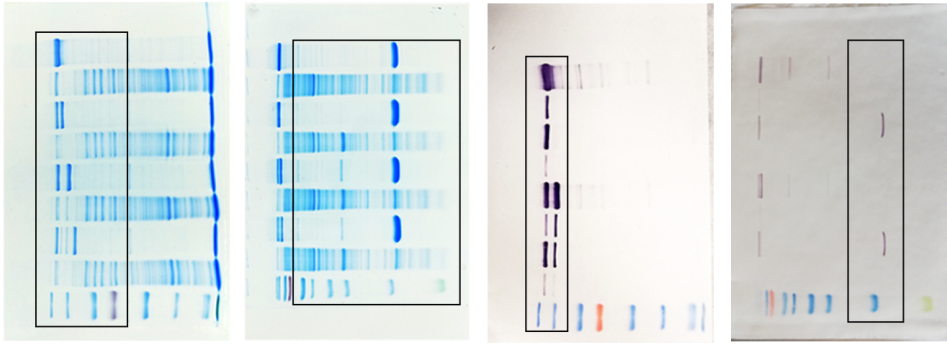

**Figure 2D**

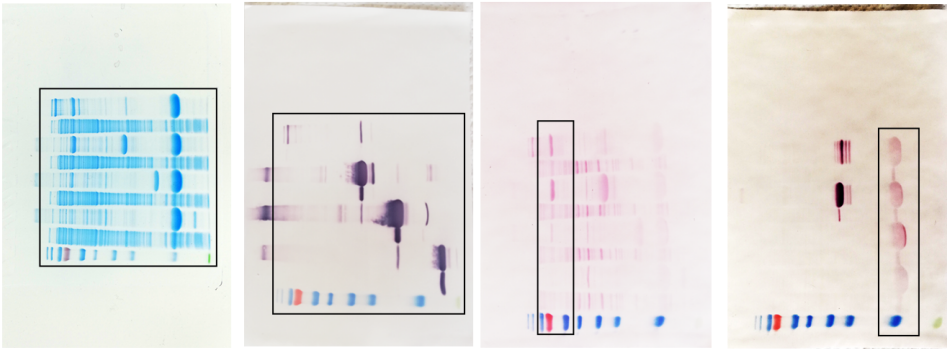

**Figure 2C**

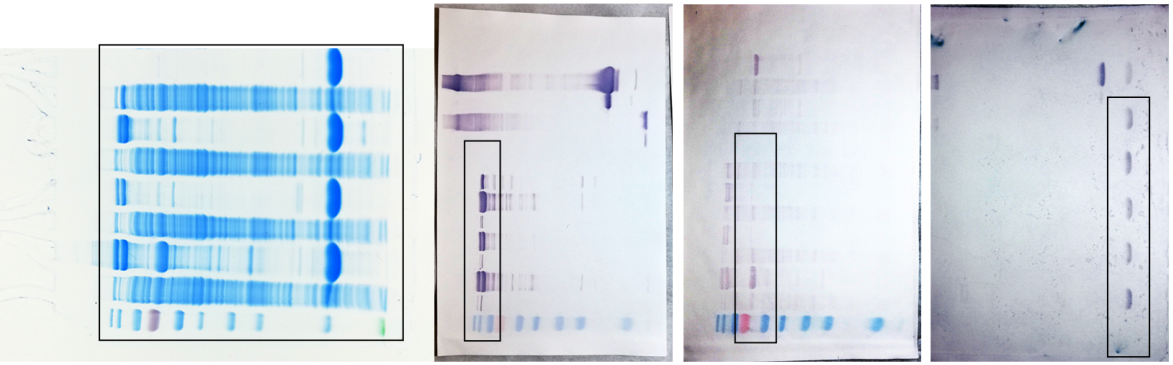

**Figure 2B**

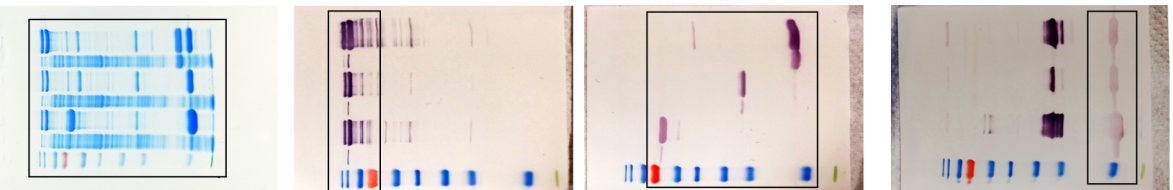

**Figure 1B**

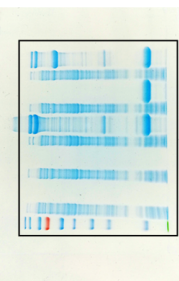

**Figure 1C**

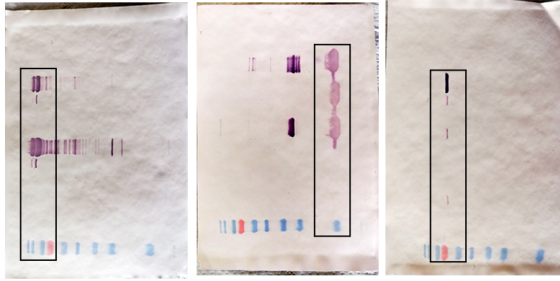

Supplementary Figure 12 | Uncropped gels and Western-blot shown in this study.

**Figure S6**

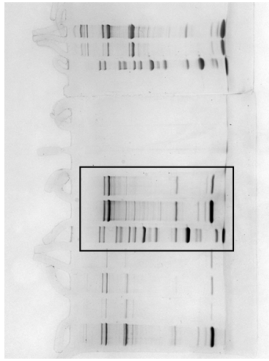

**Figure S4**

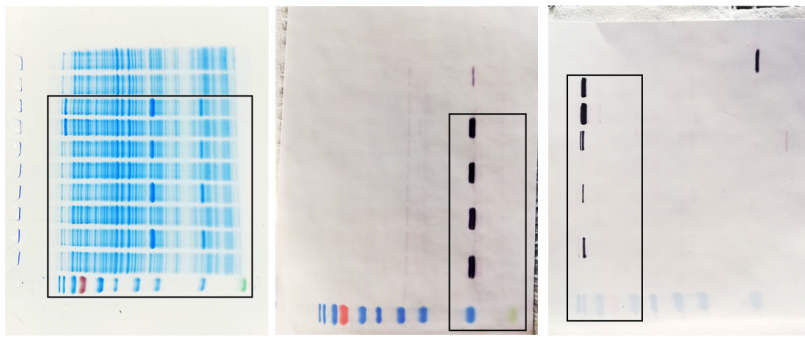

**Figure S3**

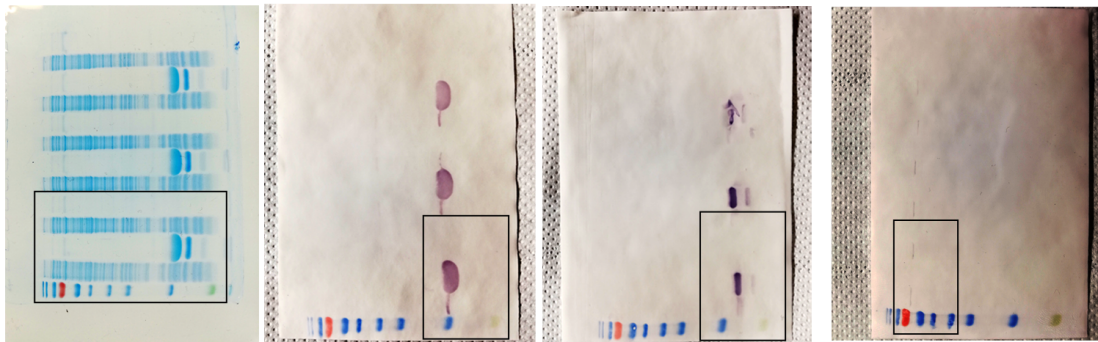

**Supplementary Figure 12 (continued)** | Uncropped gels and Western-blots shown in this study.

**Supplementary Table 1.** Inter-protein and intra-protein contacts of Rhs, EagR and VgrG detected by cross-linking with NNP9 coupled to mass spectrometry analyses.

| Interacting proteins             | Domains      | Protein 1  | Protein 2 | Sum. score | Repetitions |
|----------------------------------|--------------|------------|-----------|------------|-------------|
| <b>Inter-protein cross-links</b> |              |            |           |            |             |
| EagR-Rhs1                        | EagR-prePAAR | EagR S74   | Rhs S2    | 556.665845 | 3           |
|                                  |              | EagR T112  | Rhs S2    | 146.7494   | 2           |
|                                  |              | EagR S117  | Rhs S2    | 440.393313 | 3           |
|                                  | EagR-TMD2    | EagR S74   | Rhs S23   | 248.418767 | 3           |
|                                  |              | EagR S117  | Rhs K252  | 191.604616 | 2           |
|                                  |              | EagR S74   | Rhs K266  | 113.027074 | 2           |
| EagR-VgrG                        | EagR-Gp5     | EagR S74   | VgrG S513 | 154.435659 | 2           |
|                                  |              | EagR S117  | VgrG S513 | 344.787928 | 3           |
| VgrG-Rhs1                        | Gp5-prePAAR  | VgrG K495  | Rhs S2    | 126.301191 | 2           |
|                                  |              | VgrG S513  | Rhs S2    | 213.734864 | 3           |
|                                  |              | VgrG K558  | Rhs S2    | 176.59158  | 2           |
|                                  |              | VgrG T575  | Rhs S2    | 84.0028947 | 2           |
|                                  |              | VgrG K578  | Rhs S2    | 223.263501 | 3           |
|                                  |              | VgrG S580  | Rhs S2    | 142.234654 | 3           |
|                                  |              | VgrG K585  | Rhs S2    | 271.78799  | 3           |
|                                  | Gp27-prePAAR | VgrG K6    | Rhs S2    | 235.947861 | 2           |
|                                  |              | VgrG T112  | Rhs S2    | 85.563533  | 2           |
|                                  |              | VgrG T252  | Rhs S2    | 85.2255021 | 2           |
| <b>Intra-protein crosslinks</b>  |              |            |           |            |             |
| VgrG                             | Gp27-Gp27    | VgrG K6    | VgrG K90  | 217.276464 | 3           |
|                                  | Gp5-Gp5      | VgrG K558  | VgrG K498 | 87.6341921 | 2           |
| Rhs1                             | prePAAR-PAAR | Rhs S2     | Rhs S145  | 133.284346 | 2           |
|                                  |              | Rhs S2     | Rhs K173  | 258.140749 | 3           |
|                                  |              | Rhs S2     | Rhs K181  | 213.484328 | 3           |
|                                  | prePAAR-TMD2 | Rhs S2     | Rhs K226  | 207.428304 | 3           |
|                                  |              | Rhs S2     | Rhs K234  | 221.499631 | 3           |
|                                  |              | Rhs S2     | Rhs K247  | 160.15346  | 3           |
|                                  |              | Rhs S2     | Rhs K251  | 327.546684 | 3           |
|                                  |              | Rhs S2     | Rhs K252  | 145.863835 | 2           |
|                                  |              | Rhs S2     | Rhs K254  | 219.840478 | 3           |
|                                  |              | Rhs S2     | Rhs S258  | 70.3621506 | 2           |
|                                  |              | Rhs S2     | Rhs K266  | 203.446308 | 3           |
| Rhs S2                           | Rhs K275     | 165.808631 | 3         |            |             |

|  |                |           |           |            |   |
|--|----------------|-----------|-----------|------------|---|
|  | prePAAR-barrel | Rhs S2    | Rhs Y383  | 57.1368549 | 2 |
|  |                | Rhs S2    | Rhs S390  | 75.1920292 | 2 |
|  |                | Rhs S2    | Rhs Y421  | 63.8548761 | 2 |
|  |                | Rhs S2    | Rhs Y429  | 76.2194561 | 2 |
|  |                | Rhs S2    | Rhs T457  | 82.2626782 | 2 |
|  |                | Rhs S2    | Rhs K519  | 187.744301 | 3 |
|  | PAAR-TMD2      | Rhs K173  | Rhs K251  | 79.7362991 | 2 |
|  | TMD2-barrel    | Rhs K226  | Rhs K519  | 141.095336 | 3 |
|  |                | Rhs K251  | Rhs K519  | 73.8963874 | 2 |
|  |                | Rhs K254  | Rhs K518  | 138.865154 | 3 |
|  |                | Rhs K266  | Rhs K519  | 88.6816159 | 3 |
|  |                | Rhs T271  | Rhs K519  | 78.3821213 | 2 |
|  | barrel         | Rhs S885  | Rhs S939  | 130.020977 | 2 |
|  | barrel-CT      | Rhs K282  | Rhs K1463 | 99.9313447 | 2 |
|  |                | Rhs K282  | Rhs K1476 | 98.5609677 | 3 |
|  | CT             | Rhs K1362 | Rhs K1464 | 212.879594 | 2 |
|  |                | Rhs K1373 | Rhs K1464 | 207.342656 | 2 |

**Supplementary Table 2.** Cryo-EM data collection, processing and model refinement statistics of the *P. laumondii* EagR-Rhs1 complex.

|                                                        |                     |
|--------------------------------------------------------|---------------------|
| <u>Data collection</u>                                 | EMD-13587, PDB 7PQ5 |
| Microscope                                             | Talos Arctica       |
| camera                                                 | Gatan K2 Summit     |
| Voltage (kV)                                           | 200                 |
| Magnification                                          | 45 000              |
| Electron exposure (e <sup>-</sup> per Å <sup>2</sup> ) | 1.32                |
| Total Dose                                             | 49.75               |
| Pixel size (Å)                                         | 0.93                |
| Decofocus range (um)                                   | -0.5 to -2          |
| <u>Processing</u>                                      |                     |
| Symmetry imposed                                       | C1                  |
| Micrographs number                                     | 8550                |
| Initial particle images (no.)                          | 1 036 869           |
| Final particle images (no.)                            | 140 577             |
| Map resolution (Å)–(0.143 FSC threshold model)         | 3.1                 |
| <u>Refinement and validation</u>                       |                     |
| Map sharpening (B-factor) (Å <sup>-2</sup> )           | 75.76               |
| <u>Model composition</u>                               |                     |
| No. of chains                                          | 1                   |
| Atoms (no.)                                            | 8527                |
| Residues (no.)                                         | 1049                |
| Ligands (no.)                                          | 0                   |
| Bond lengths (Å)                                       | 0.005               |
| Bond angles (°)                                        | 1.178               |
| Ramachandran favored %                                 | 95.28               |
| Ramachandran allowed %                                 | 4.52                |
| Ramachandran outliers %                                | 0.19                |
| Rotamers outliers %                                    | 2.92                |
| MolProbity score                                       | 1.8                 |
| Clashscore                                             | 3.37                |
| CC (mask)                                              | 0.87                |
| CC (box)                                               | 0.85                |
| CC (peaks)                                             | 0.82                |
| CC (volume)                                            | 0.86                |



**Supplementary Table 3. Strains, plasmids and oligonucleotides used in this study.**

| Strains                                  | Description and genotype                                                                                                                                                                          | Source/References     |
|------------------------------------------|---------------------------------------------------------------------------------------------------------------------------------------------------------------------------------------------------|-----------------------|
| <i>Escherichia coli</i> K12              |                                                                                                                                                                                                   |                       |
| DH5α                                     | F-, Δ( <i>argF-lac</i> )U169 <i>phoA supE44 lacZ</i> ΔM15 <i>recA relA endA thi hsdR gyr</i>                                                                                                      | Laboratory collection |
| BL21(DE3)                                | <i>dcm ompT hsdS gal λDE3</i>                                                                                                                                                                     | Laboratory collection |
| <i>Photorhabdus laumondii</i>            |                                                                                                                                                                                                   |                       |
| TT01                                     | WT <i>Photorhabdus laumondii</i>                                                                                                                                                                  | 2                     |
| Plasmid                                  | Description and main characteristics                                                                                                                                                              | Source/References     |
| pET-Duet1                                | pBR322 ColE1 <i>ori</i> , T7 promoter, Amp <sup>R</sup>                                                                                                                                           | Novagen               |
| pET-His-VgrG                             | <i>P. laumondii vgrG</i> gene ( <i>plu0355</i> ) cloned into pET-Duet1, N-terminal 6×His tag, TEV cleavage                                                                                        | 3                     |
| pET-His-VgrG-Δ27                         | <i>P. laumondii vgrG</i> gene deleted of the gp27-coding sequence cloned into pET-Duet1                                                                                                           | This study            |
| pET-His-VgrG-Δ27-OB                      | <i>P. laumondii vgrG</i> gene deleted of the gp27 and OB-fold-coding sequence cloned into pET-Duet1                                                                                               | This study            |
| pRSF-Duet1                               | RSF1030 (NTP1) <i>ori</i> , T7 promoter, Kan <sup>R</sup>                                                                                                                                         | Novagen               |
| pRSF-EagR-ST                             | <i>P. laumondii eagR</i> gene ( <i>plu0354</i> ) cloned into pRSF-Duet1, C-terminal Strep-tag                                                                                                     | 3                     |
| pCDF-Duet1                               | CloDF13 <i>ori</i> , T7 promoter, Strep <sup>R</sup>                                                                                                                                              | Novagen               |
| pCDF-Rhs1*-FL                            | <i>P. laumondii rhs1</i> gene ( <i>plu0353</i> ) cloned into pCDF-Duet1, C-terminal FLAG tag, Tyr1351-to-Ala and Tyr1375-to-Ala substitutions                                                     | 3                     |
| pCDF-Rhs1*-FL-D288N                      | Asp288-to-Asn substitutions in pCDF-Rhs1*-FL                                                                                                                                                      | This study            |
| pCDF-Rhs1*-FL-D1338N                     | Asp1338-to-Asn substitution in pCDF-Rhs1*-FL                                                                                                                                                      | 3                     |
| pCDF-Rhs1*-FL-D288N-D1338N               | Asp288-to-Asn and Asp1338-to-Asn substitutions in pCDF-Rhs1*-FL                                                                                                                                   | This study            |
| pCDF-Rhs1-FL-ΔprePAAR-TMD1               | <i>P. laumondii rhs1</i> gene deleted of the prePAAR-TMD1-coding sequence cloned into pCDF-Duet1, C-terminal FLAG tag, Tyr1351-to-Ala, Tyr1375-to-Ala, Asp1338-to-Asn substitutions               | This study            |
| pCDF-Rhs1-FL-ΔprePAAR-TMD1-PAAR          | <i>P. laumondii rhs1</i> gene deleted of the prePAAR-TMD1-PAAR-coding sequence cloned into pCDF-Duet1, C-terminal FLAG tag, Tyr1351-to-Ala, Tyr1375-to-Ala, Asp1338-to-Asn substitutions          | This study            |
| pCDF-Rhs1-FL-ΔprePAAR-TMD1-PAAR-postPAAR | <i>P. laumondii rhs1</i> gene deleted of the prePAAR-TMD1-PAAR-postPAAR-coding sequence cloned into pCDF-Duet1, C-terminal FLAG tag, Tyr1351-to-Ala, Tyr1375-to-Ala, Asp1338-to-Asn substitutions | This study            |

|                                    |                                                                                                                 |            |
|------------------------------------|-----------------------------------------------------------------------------------------------------------------|------------|
| pCDF-prePAAR-TMD1-PAAR-postPAAR-FL | <i>P. laumondii rhs1</i> prePAAR-TMD1-PAAR-postPAAR-coding sequence cloned into pCDF-Duet1, C-terminal FLAG tag | This study |
| pCDF-prePAAR-TMD1-PAAR-FL          | <i>P. laumondii rhs1</i> prePAAR-TMD1-PAAR-coding sequence cloned into pCDF-Duet1, C-terminal FLAG tag          | This study |
| pCDF-prePAAR-TMD1-FL               | <i>P. laumondii rhs1</i> prePAAR-TMD1-coding sequence cloned into pCDF-Duet1, C-terminal FLAG tag               | This study |
| pCDF-postPAAR-FL                   | <i>P. laumondii rhs1</i> postPAAR-coding sequence cloned into pCDF-Duet1, C-terminal FLAG tag                   | This study |
| pBAD33                             | Cloning vector, pACYC P15A <i>ori</i> , <i>araBAD</i> promoter, Cat <sup>R</sup>                                | 4          |
| pBAD33-rbs                         | pBAD33 with ribosome-binding site consensus sequence inserted into MCS                                          | This study |
| pBAD-Rhs1                          | <i>P. laumondii rhs1</i> gene ( <i>plu0353</i> ) cloned into pBAD33-rbs                                         | This study |
| pBAD-Rhs1-D288N                    | Asp288-to-Asn substitutions in pBAD-Rhs1                                                                        | This study |
| pBAD-Rhs1-D1338N                   | Asp1338-to-Asn substitution in pBAD-Rhs1                                                                        | This study |
| pBAD-Rhs1-D288N-D1338N             | Asp288-to-Asn and Asp1338-to-Asn substitutions in pBAD-Rhs1                                                     | This study |

| Oligonucleotide | Sequence (5' to 3') | Purpose |
|-----------------|---------------------|---------|
|-----------------|---------------------|---------|

Plasmid construction<sup>a</sup>

|                    |                                       |                                                                   |
|--------------------|---------------------------------------|-------------------------------------------------------------------|
| F-pIVgrG3-386-Bmt  | GGGCGCTAGCGCGATGGAGGGCCCCGCAGAT       | in pair with R-pIVgrG3-Hind to clone C terminal fragments of VgrG |
| F-pIVgrG3-485-Bmt  | GGGCGCTAGCGGCAGCAAAACCCAGATGA         | in pair with R-pIVgrG3-Hind to clone C terminal fragments of VgrG |
| R-pIVgrG-hind      | GACTAAGCTTTCAGTTCACATTGACCTGTTTG      | to clone VgrG or C terminal fragments of VgrG                     |
| F-plRhsPAAR-sac    | GGAGGAGCTCATGGTGGACAGCATCGGCCC        | in pair with R-plRhs-Sal to clone N terminally truncated Rhs1     |
| F-plRhsTM2-sac     | GGAGGAGCTCATGTCCGGTCAGGGAACCTTACCTGG  | in pair with R-plRhs-Sal to clone N terminally truncated Rhs1     |
| F-plRhs-barrel-Sac | GGAGGAGCTCATGACGAAAAAATTCTTTACCGG     | in pair with R-plRhs-Sal to clone N terminally truncated Rhs1     |
| R-plRhs-Sal        | GATCGTCGACTTTTCCCTCCGCACTTTCTGATT     | to clone Rhs or N terminally truncated Rhs1                       |
| F-plRhs-Sac        | GGAGGAGCTCATGTCACCTGGTGATGAAATCG      | to clone Rhs or N terminal fragments of Rhs1                      |
| R-plRhsTMD1-Sal    | GATCGTCGACGTTCGTGACGGCCGAACCTGG       | in pair with F-plRhs-Sac to clone N terminal fragments of Rhs1    |
| R-plRhsPAAR-Sal    | GATCGTCGACGCCGATAAACACCGTTTTTGG       | in pair with F-plRhs-Sac to clone N terminal fragments of Rhs1    |
| R-plTMPAARTM-Sal   | GATCGTCGACCGTCGCTTCCCGGTAACGTTTT      | in pair with F-plRhs-Sac to clone N terminal fragments of Rhs1    |
| F-pBAD-MCS2        | GATCCTCTAGAGTCGACCTGCAG               | in pair with R-pBADsd-Sac to insert rbs sequence into pBAD33      |
| R-pBADsd-Sac       | GTACCGAGCTCCCTCCTGAATTCGCTAGCCCAAAAAA | in pair with F-pBAD-MCS2 to insert rbs sequence into pBAD33       |

### Site directed mutagenesis <sup>b</sup>

|                |                               |                                |
|----------------|-------------------------------|--------------------------------|
| F-plRhs-D288N  | <u>A</u> ACCCGATTGACGTCACCACC | introduce Rhs1 D288N mutation  |
| R-plRhs-D288   | GCCGGTAAAGAATTTTTTCGTCGC      | introduce Rhs1 D288N mutation  |
| F-plRhs-D1338N | <u>A</u> ACCCTCTAGGGCTTGCTGGT | introduce Rhs1 D1338N mutation |
| R-plRhs-D1338  | AATAAATTCGTGGGATTTTGCACATAGC  | introduce Rhs1 D1338N mutation |

<sup>a</sup> Restriction site in bold.

<sup>b</sup> introduced mutation underlined.

## Supplementary References

1. Ahmad, S., Tsang, K.K., Sachar, K., Quentin, D., Tashin, T.M., Bullen, N.P., Raunser, S., McArthur, A.G., Prehna, G., & Whitney, J.C. Structural basis for effector transmembrane domain recognition by type VI secretion system chaperones. *Elife* **9**, e62816 (2020)
2. Duchaud, E., Rusniok, C., Frangeul, L., Buchrieser, C., Givaudan, A., Taourit, S., Bocs, S., Boursaux-Eude, C., Chandler, M., Charles, J.-F., *et al.* The genome sequence of the entomopathogenic bacterium *Photorhabdus luminescens*. *Nat Biotechnol* **21**, 1307–1313 (2003).
3. Jurenas, D., Payelleville, A., Roghanian, M., Turnbull, K.L., Givaudan, A., Brillard, J., Hauryliuk, V., & Cascales, E. *Photorhabdus* antibacterial Rhs polymorphic toxin inhibits translation through ADP-ribosylation of 23S ribosomal RNA. *Nucleic Acids Research* **49**, 8384–8395 (2021).
4. Guzman, L.M., Belin, D., Carson, M.J., & Beckwith, J. Tight regulation, modulation, and high-level expression by vectors containing the arabinose PBAD promoter. *J Bacteriol* **177**, 4121–4130 (1995).
